# Supplementary material for: Efficacy of Transcendental Meditation to Reduce Stress Among Health Care Workers: A Randomized Clinical Trial
Source: PubMed Central journal article supplement (PMC9486450; doi:10.1001/jamanetworkopen.2022.31917), 2022-09-19
Supplement: jamanetwopen-e2231917-s003.pdf [file jamanetwopen-e2231917-s003.pdf]

## Data Sharing Statement

Joshi. Efficacy of Transcendental Meditation to Reduce Stress Among Health Care Workers. *JAMA Netw Open*. Published September 19, 2022. doi:10.1001/jamanetworkopen.2022.31917

### Data

**Data available:** Yes

**Data types:** Deidentified participant data, Data dictionary

**How to access data:** [sangeeta.joshi@duke.edu](mailto:sangeeta.joshi@duke.edu)

**When available:** With publication

### Supporting Documents

**Document types:** None

### Additional Information

**Who can access the data:** researchers whose proposed use of the data has been approved

**Types of analyses:** for Research purposes.

**Mechanisms of data availability:** after approval of a proposal, with a signed data access agreement
